# Supplementary material for: Hierarchical macropore/nano surface regulates stem cell fate through a ROCK-related signaling pathway
Source: Royal Society of Chemistry journal article supplement (doi:10.1039/c6ra26509j), 2017-01-01
Supplement: c6ra26509j1.pdf [file c6ra26509j1.pdf]

| Target gene         | Direction | 5'-3' Primer sequence           |
|---------------------|-----------|---------------------------------|
| Runx2               | F         | 5'-ATACTCTCCTGGGACTGTTTTTCG -3' |
|                     | R         | 5'-GATGTTGCTCTGTTCGTTTTCTT -3'  |
| COL1                | F         | 5'-CGTGACCAAAAACCAAAAGTGC-3'    |
|                     | R         | 5'-GGGGTGGAGAAAGGAACAGAAA-3'    |
| OC                  | F         | 5'-AGACTCCGGCGCTACCTCAACAAT-3'  |
|                     | R         | 5'-CAGCTGTGCCGTCCATACT-3'       |
| Integrin $\beta$ 1  | F         | 5'-TCTGTGGAGGAAATGGTGTGTG -3'   |
|                     | R         | 5'-TTTAGTGAGGTTGAAATGGGAGC -3'  |
| Integrin $\alpha$ 2 | F         | 5'-ACTTGTTTTTTGCCTCTTTCTCC -3'  |
|                     | R         | 5'-TGTTTGTTTCTTGGCTCTCACTG -3'  |
| Integrin $\alpha$ 5 | F         | 5'-ACTTAGGGCAAGTCGGGAATT-3'     |
|                     | R         | 5'-GGGCAGTGAGTGGGGTTTAT-3'      |
| GAPDH               | F         | 5'-GGCACAGTCAAGGCTGAGAATG-3'    |
|                     | R         | 5'-ATGGTGGTGAAGACGCCAGTA-3'     |

**Supplementary Table 1.** Primers used for RT-qPCR.
